## Original article

# Mortality over 14 years in MTX-refractory patients randomized to a strategy of addition of infliximab or sulfasalazine and hydroxychloroquine

Heather Miller <sup>1</sup>, Johan K. Wallman <sup>2</sup>, Ingemar F. Petersson<sup>3,4</sup>,  
Saedis Saevarsdottir<sup>1,5</sup>, Jonas Söderling<sup>1</sup>, Sofia Ernestam<sup>1,6</sup>, Johan Askling<sup>1</sup>,  
Ronald van Vollenhoven<sup>7</sup> and Martin Neovius<sup>1</sup>

## Abstract

**Objective.** To compare mortality risk over up to 14 years of follow-up in methotrexate-refractory patients with early RA randomized to a strategy starting with addition of infliximab vs addition of SSZ and HCQ.

**Methods.** Data was from the two-arm, parallel, randomized, active-controlled, open-label Swefot trial in which patients with early RA (symptom duration <1 y) were recruited from 15 rheumatology clinics in Sweden (2002–2005). Patients who did not achieve low disease activity after 3–4 months of MTX were randomized to addition of infliximab ( $n = 128$ ) or SSZ and HCQ ( $n = 130$ ). Participants were followed until death, emigration, or end of follow-up, whichever came first. Analyses were by intention-to-treat.

**Results.** Over an average follow-up of 13 years, there were 13 and 16 deaths, respectively [8.8 vs 10.6 deaths per 1000 person-years; mortality hazard ratio 1.2 (95% CI: 0.6, 2.5);  $P = 0.62$ ]. The 1-year mortality was 0.8% in both treatment arms, the 5-year mortality was 2.3% for the infliximab arm compared with 1.5% for the conventional combination treatment arm, while the 10-year mortality was 7.8% and 7.7%, respectively. After 5 years, ~50% of patients in the conventional combination therapy arm had switched to biologic treatment, and 50% in the biologic arm had discontinued treatment with a biologic DMARD.

**Conclusion.** No difference in mortality risk could be observed over up to 14 years of follow-up between treatment strategy groups. At 5 years (3 years after trial cessation), 50% of patients remained on their assigned therapy, reflecting that DMARD combination is an adequate treatment strategy in 50% of patients.

**Trial registration.** clinicaltrials.gov, identifier: NCT00764725.

**Key words:** mortality, rheumatoid arthritis, randomized controlled trial, register

## Rheumatology key messages

- Data are limited on mortality risk in patients with early RA initiating a biologic treatment.
- Addition of biologic vs conventional DMARDs to methotrexate monotherapy does not affect mortality risk.

<sup>1</sup>Department of Medicine Solna, Karolinska Institutet, Stockholm,

<sup>2</sup>Department of Clinical Sciences Lund, <sup>3</sup>Department of Orthopedics, Lund University, <sup>4</sup>Skåne University Hospital, Lund, Sweden,

<sup>5</sup>School of Health Sciences, Faculty of Medicine, University of Iceland, Reykjavik, Iceland, <sup>6</sup>Academic Specialist Center, Stockholm Health Services, Stockholm, Sweden and

<sup>7</sup>Amsterdam Rheumatology and Immunology Center, University of Amsterdam, Amsterdam, The Netherlands

Submitted 3 May 2020; accepted 21 July 2020

Correspondence to: Heather Miller, Clinical Epidemiology Division, Department of Medicine Solna, T2, Karolinska Institutet, SE-171 76 Stockholm, Sweden. E-mail: heather.miller@ki.se

## Introduction

Among patients with RA, worse disease severity is associated with increased mortality [1]. Most studies continue to report that patients with established RA have a higher mortality rate than the general population [2–5], although some show trends of reduced excess mortality when compared with the general population [2].

Although long-term mortality for newly diagnosed RA patients has decreased over time, it remains elevated compared with the general population in both Canada

[6] and Sweden [7]. A 23-year follow up of the COBRA trial demonstrated that intensive treatment of early RA using conventional therapies (MTX vs MTX+ SSZ) can provide long-term benefits [8]. Other studies have echoed the importance of early treatment, showing that, compared with late treatment, early treatment can reduce, but not eliminate, excess mortality over the long term [3].

Markers of disease activity and severity appear to be significant determinants of increased mortality in RA patients [9–11]. Although the management of RA has significantly improved since the introduction of biologic therapies [12], it remains unclear how this has affected patients' risk of death. While biologics improve disease activity control compared with MTX alone, not all patients are responsive to a first-choice biologic but end up switching to another biologic or a targeted synthetic DMARD. There are a number of trials comparing treatment strategies in early RA with regard to RA disease activity, but an almost total lack of studies that have gone on to report longer-term effects such as mortality.

Although some studies underline the potential mortality benefits of early treatment, there remains a scarcity of research that assesses the impact of modern treatment strategies. A 5-year follow up of incident RA patients showed that those diagnosed after the year 2000 appear to have reduced mortality risk compared with those diagnosed prior to 2000 [13]. Although the greatest increase in mortality risk appears to occur after 7–10 years of disease onset [9], it is possible that improved RA treatments along with a paradigm shift in RA management towards early, aggressive treatment, could have mortality benefits. Indeed, long-term mortality data from randomized strategy trials, irrespective of the strategy under study, are scarce to non-existent and it is particularly unclear how initial treatment strategy, in a treat-to-target setting, in early RA can affect risk of mortality. It is therefore unknown whether strategies starting with biologic treatment are associated with different mortality outcomes compared with strategies starting with non-biologic alternatives.

To better understand the impact of the early RA treatment strategy on long-term mortality, the aim of this study was to compare mortality risk over up to 14 years of follow-up between patients from the Swefot trial of early MTX-refractory RA, randomized to the addition of infliximab or the addition of SSZ and HCQ.

## Methods

### Participants

The Swefot trial has been described in detail elsewhere [14]. Briefly, adult patients ( $\geq 18$  years of age) with early RA (symptom duration  $< 1$  year) were recruited from 15 rheumatology units across Sweden from 2002 to 2005. Key inclusion criteria were fulfilment of the 1987 American College of Rheumatology criteria [15], a disease activity score based on 28-joint count (DAS28) of

$> 3.2$  [16], no previous DMARD treatment, either absence or stably dosed oral glucocorticoid therapy for at least 4 weeks, and using at most 10 mg daily prednisolone (or equivalent). The main exclusion criterion was contraindications to any of the trial drugs. Patients were administered methotrexate and, after 3–4 months, those who had not achieved low disease activity were randomly allocated addition of either SSZ and HCQ or infliximab. Swefot was approved by the national health authorities/ethics committees at all sites and was conducted in accordance to the Declaration of Helsinki. All participants gave written consent prior to inclusion.

As previously reported, the addition of infliximab led to superior response according to EULAR criteria at 9 months [14] whereas no statistically significant difference was evident at 15 or 21 months after randomization [17]. Superior radiographical findings were demonstrated at 21 months in the infliximab group [17], while quality of life [18] and work loss [19] improved similarly for the two treatment strategies.

During the first 2-year trial period, included patients were scheduled for a visit at the rheumatology clinic at seven different time points. From years 3 through 7, data on treatment were collected from the Swedish Rheumatology Quality Register [20]. Randomized patients could discontinue the assigned treatment at any time for lack of effectiveness, side effects, or by own choice. Treatment was decided by the responsible rheumatologist in case of discontinuation and after the 2-year trial period.

As a benchmark, we also contrasted the Swefot patients with general population comparators identified from the Swedish Total Population Register [21]. Comparators were matched 5:1 to Swefot participants by age, sex, education and county of residence at index/diagnosis date.

### Follow-up and outcome

For this study, we linked the Swefot trial database to the Swedish Total Population Register [21] and the Causes of Death Register with outcome data until 31 August 2017, resulting in mortality data for up to 14 years from inclusion. This register contains information on death date as well as the underlying and contributing causes of death for all persons registered as Swedish residents. Participants were followed until death, emigration (retrieved from the Total Population Register), or end of follow-up, whichever came first. Through these linkages, all deaths and emigrations during follow-up were detected.

### Statistical analyses

Data were analysed by intention to treat, analysing all randomized patients according to their original treatment allocation, using Stata v14.0 (Stata Corp, TX, USA). We plotted Kaplan–Meier mortality curves to illustrate cumulative mortality, and used Cox regression to estimate hazard ratios with 95% CIs. The proportional hazards

**TABLE 1** Characteristics of early RA patients randomized to addition of infliximab or conventional combination treatment

|                                                              | Infliximab+MTX treatment<br>( <i>n</i> = 128) | Conventional combination treatment<br>(SSZ and HCQ) ( <i>n</i> = 130) |
|--------------------------------------------------------------|-----------------------------------------------|-----------------------------------------------------------------------|
| Age (years), mean (s.d.)                                     | 51.9 (13.2)                                   | 53.7 (14.0)                                                           |
| Women, <i>n</i> (%)                                          | 97 (76)                                       | 101 (78)                                                              |
| Rheumatoid factor positive (%)                               | 88 (69)                                       | 85 (65)                                                               |
| RA symptom duration at RA diagnosis<br>(months), mean (s.d.) | 10.1 (3.4)                                    | 10.1 (3.5)                                                            |
| DAS28 <sup>a</sup> , mean (s.d.)                             | 4.9 (1.0)                                     | 4.8 (1.0)                                                             |
| HAQ <sup>b</sup> , mean (s.d.)                               | 0.9 (0.5)                                     | 1.0 (0.6)                                                             |
| EQ-5D utility (18) <sup>c</sup>                              |                                               |                                                                       |
| Mean (s.d.)                                                  | 0.51 (0.29)                                   | 0.55 (0.27)                                                           |
| Median (25th–75th)                                           | 0.62 (0.29–0.73)                              | 0.62 (0.52–0.73)                                                      |
| Minimum–maximum                                              | –0.18 to 1.00                                 | –0.24 to 1.00                                                         |
| Education, <i>n</i> (%)                                      |                                               |                                                                       |
| <10 years                                                    | 19 (15)                                       | 26 (20)                                                               |
| 10–12 years                                                  | 71 (55)                                       | 63 (48)                                                               |
| >12 years                                                    | 30 (23)                                       | 30 (23)                                                               |
| missing                                                      | 8 (6)                                         | 11 (8)                                                                |
| Smoking <sup>d</sup> , <i>n</i> (%)                          | 33 (26)                                       | 30 (23)                                                               |
| Comorbidity <sup>e</sup> , <i>n</i> (%)                      |                                               |                                                                       |
| Infection                                                    | 16 (12.5)                                     | 7 (5.4)                                                               |
| Malignancy                                                   | 0 (0)                                         | 2 (1.5)                                                               |
| Cardiovascular disease                                       | 2 (1.6)                                       | 5 (3.8)                                                               |
| Diabetes <sup>f</sup>                                        | 4 (3.1)                                       | 4 (3.1)                                                               |
| Depression/anxiety disorder                                  | 4 (3.1)                                       | 2 (1.5)                                                               |
| Hypertension <sup>g</sup>                                    | 8 (6.3)                                       | 11 (8.5)                                                              |
| Hip or knee prosthesis                                       | 2 (1.6)                                       | 3 (2.3)                                                               |

<sup>a</sup>28-joint count disease-activity score. <sup>b</sup>HAQ; missing HAQ data for four patients in the infliximab arm and two patients in the conventional combination treatment arm. <sup>c</sup>EuroQol 5-Dimensions, UK preference set. Missing EQ-5D information for 21 patients in the infliximab treatment group and for 13 patients in the conventional combination treatment group. <sup>d</sup>Missing smoking information for five patients in the infliximab arm and for four patients in the conventional combination treatment arm. <sup>e</sup>Comorbidities up to 5 years before start of follow-up. Comorbidity based on outpatient (includes 1 year prior to follow-up) or inpatient visit (includes 5 years prior to follow-up) with corresponding ICD10 Codes (retrieved from: National Patient Register). <sup>f</sup>A diagnosis of diabetes was assumed if ATC (Anatomical Therapeutic Chemical) classification system prescription code of insulin or oral diabetes drugs (retrieved from: Swedish Prescribed Drug Register). <sup>g</sup>Hypertension diagnosis assumed if ATC classification system prescription code of antihypertensive drug (retrieved from: Swedish Prescribed Drug Register).

assumption was tested by introducing an interaction term for treatment group and follow-up time.

biologics and 50% allocated to infliximab had discontinued use of a biologic (Fig. 1).

## Results

### Participant characteristics

Between October 2002 and December 2005, a total of 493 patients with new-onset RA were screened for inclusion. After screening, 487 patients entered the run-in period receiving methotrexate monotherapy. Of the 258 patients with DAS28 > 3.2 at the end of the 3–4 month run-in period, which was the definition of insufficient response to MTX, 128 were randomized to the addition of infliximab, and 130 to the addition of conventional combination therapy (SSZ and HCQ). At randomization, there were no significant between-group differences in patient characteristics or comorbidities (Table 1).

In our study, after 5 years, ~50% of patients allocated to conventional combination treatment had initiated

### Follow-up and outcome

During a median follow-up of 12.8 years in the infliximab arm and 12.9 years in the conventional treatment arm, there were 13 and 16 deaths, respectively (Table 2). The mortality rates were 8.8 (95% CI: 0.0, 25.1) per 1000 person-years in the infliximab arm, and 10.6 (95% CI: 0.0, 28.4) in the conventional combination treatment arm, respectively; mortality hazard ratio 1.2; 95% CI: 0.6, 2.5; *P* = 0.62 (Table 2 and Fig. 2). The test of whether the proportional hazards assumption was violated was not statistically significant (*P* = 0.43), but the mortality curves for the two treatments crossed after about 11 years of follow-up.

The 1-year mortality was 0.8% in both treatment arms, the 5-year mortality was 2.3% for the infliximab arm compared with 1.5% for the conventional

**Fig. 1** Drug survival in Swefot patients over up to 8 years' follow-up

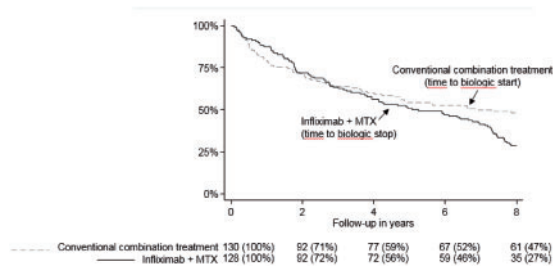

**TABLE 2** All-cause mortality over up to 14 year follow-up, by initial treatment arm allocation

|                              | Infliximab+MTX treatment (n = 128) | Conventional combination treatment <sup>a</sup> (n = 130) |
|------------------------------|------------------------------------|-----------------------------------------------------------|
| n                            | 128                                | 130                                                       |
| n deaths                     | 13                                 | 16                                                        |
| n loss to follow-up          | 0                                  | 0                                                         |
| Sum follow-up (years)        | 1477                               | 1504                                                      |
| Deaths per 1000 person years | 8.8                                | 10.6                                                      |
|                              | (95% CI: 0.0, 25.1)                | (95% CI: 0.0, 28.4)                                       |
| Causes of death (n)          |                                    |                                                           |
| Infection                    | 0                                  | 2                                                         |
| Malignancy                   | 7                                  | 3                                                         |
| Cardiovascular disease       | 1                                  | 4                                                         |
| Pulmonary disease            | 2                                  | 2                                                         |
| Hematological                | 1                                  | 0                                                         |
| Neurodegenerative            | 0                                  | 1                                                         |
| Other                        | 1                                  | 0                                                         |
| Missing <sup>b</sup>         | 1                                  | 4                                                         |

<sup>a</sup>Co, nventional combination treatment: methotrexate with the addition SSZ and HCQ. <sup>b</sup>Information on deaths that occurred in 2016 was not available.

combination treatment arm, while the 10-year mortality was 7.8% and 7.7%, respectively.

When comparing Swefot patients with age, sex, education and location-matched general population comparators, RA patients had no statistically significant increased or decreased risk of death (mortality hazard ratio 0.8; 95% CI: 0.6, 1.0;  $P=0.09$ ).

Discussion

In this study, we took advantage of the possibility to accomplish complete (zero loss to follow-up) long-term mortality follow-up via registers among patients enrolled in an early RA strategy trial in a country with universal

**Fig. 2** Cumulative incidence of death over up to 14 years of follow-up in the Swedish Swefot trial

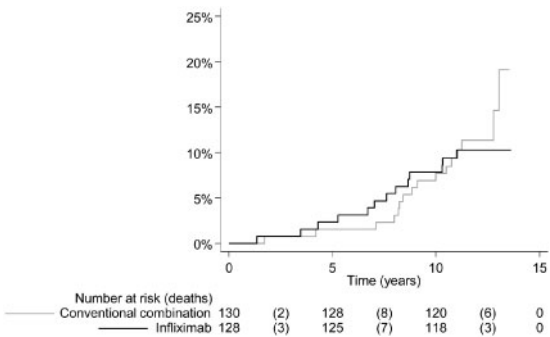

access to health care. After two years, treatment was decided by the responsible rheumatologist. This study compared initial treatment strategy rather than specific drug regimens over 12 years' follow-up in real life after trial cessation. The results indicated little difference in all-cause mortality over the decade following randomization [7]. To our knowledge, this is one of the first studies of its kind in which long-term mortality in patients with early RA has been deterministically assessed during extended follow-up of a randomized strategy trial.

Swefot is a good population to address this question, because the treatment strategy that was applied in the two-year trial is in accordance with today's treatment guidelines in early RA, and the patients have thereafter been followed in registers in Sweden, where there is equal access to health-care and treatment decisions made on clinical grounds.

No or minor differences in treatment effect and adverse events

It has long been hypothesized that a treatment strategy immediately starting with infliximab after insufficient MTX response would result in better health outcomes by better control of disease activity and slower radiological progression than conventional DMARD treatment. Because no difference in disease activity between infliximab and conventional combination treatment could be detected beyond the first year in the Swefot study [18] and in other studies of TNF inhibitors compared with combination DMARD treatment [22–24], the absence of a survival benefit may not be surprising, although better 2-year radiological outcomes were observed with infliximab in Swefot [14]. Importantly, no increased mortality risk from the strategy starting with infliximab could be detected either, which is in line with the similar adverse event profiles of the different treatments [14].

Crossover

We used the intention-to-treat principle, analysing all randomized patients according to their random allocation to make a strategy comparison of early RA patients starting with addition of infliximab vs starting with addition of conventional DMARDs after MTX failure, but

allowing and expecting multiple treatment changes over the long follow-up. As adherence to originally assigned treatment is likely to be associated with the underlying risk of death (e.g. via insufficient RA disease control), we did not consider using as-treated, per-protocol, or on-treatment approaches [25].

Over time, the more similar the treatment strategy arms became due to crossovers, diluting the possibility of detecting potential strategy-specific differences. Unless the initial treatment strategy is associated with long-term consequences of any differential effectiveness, cross-over would make the treatment arms indistinguishable. Such effects are, however, both plausible ('window of opportunity') and important to assess.

The large number of crossovers in our study are likely the result of physicians practicing today's treatment guidelines which, at least partly, follow a treat-to-target paradigm. Those who remained longer on their allocated treatment throughout follow-up are likely to have different disease characteristics than those switching. Effectiveness-related mortality improvements from early disease control in the non-switching group are likely to be offset by the relative lack of disease control among switchers. Our results do not, however, provide any evidence that the net effects on mortality would differ by treatment strategy.

## Conclusion

No difference in mortality risk could be observed over up to 14 years of follow-up in patients with MTX-refractory early RA randomized to a strategy starting with addition of infliximab compared with a strategy starting with conventional combination treatment.

**Funding:** No specific funding was received from any funding bodies in the public, commercial or not-for-profit sectors to carry out the work described in this manuscript.

**Disclosure statement:** R.vV. has received research support and honoraria from Abbott, GSK/HGS, MSD, Pfizer, Roche and UCB Pharma. M.N. reported participating in advisory boards for Pfizer (rheumatology) and Abbott (non-rheumatology; unrelated to the current work); participating in research projects fully or partly funded by Schering-Plough, Astra Zeneca, Novo Nordisk, Pfizer, and Roche (unrelated to the current work); and serving as an external consultant (unrelated to rheumatology since 2008) to Pfizer, Sanofi-Aventis, Roche and Abbott. S.S. is a part-time employee of deCODE genetics Inc. (unrelated to the current work). J.K.W. has received consultancy fees from Celgene, Eli Lilly and Novartis (unrelated to the present work). The other authors have declared no conflicts of interest.

## References

- 1 Sokka T, Abelson B, Pincus T. Mortality in rheumatoid arthritis: 2008 update. *Clin Exp Rheumatol* 2008;26(5 Suppl 51):S35–61.
- 2 van Nies JA, de Jong Z, van der Helm-van Mil AH *et al.* Improved treatment strategies reduce the increased mortality risk in early RA patients. *Rheumatology* 2010; 49:2210–6.
- 3 Humphreys JH, Warner A, Chipping J *et al.* Mortality trends in patients with early rheumatoid arthritis over 20 years: results from the Norfolk Arthritis Register. *Arthritis Care Res* 2014;66:1296–301.
- 4 Gonzalez A, Maradit Kremers H, Crowson C *et al.* The widening mortality gap between rheumatoid arthritis patients and the general population. *Arthritis Rheum* 2007;56:3583–7.
- 5 Meune C, Touze E, Trinquart L, Allanore Y. Trends in cardiovascular mortality in patients with rheumatoid arthritis over 50 years: a systematic review and meta-analysis of cohort studies. *Rheumatology* 2009;48: 1309–13.
- 6 Widdifield J, Bernatsky S, Paterson JM *et al.* Trends in excess mortality among patients with rheumatoid arthritis in Ontario, Canada. *Arthritis Care Res* 2015;67: 1047–53.
- 7 Holmqvist M, Ljung L, Askling J. Mortality following new-onset Rheumatoid Arthritis: has modern Rheumatology had an impact? *Ann Rheum Dis* 2018;77:85–91.
- 8 Poppelaars PB, van Tuyl LHD, Boers M. Normal mortality of the COBRA early rheumatoid arthritis trial cohort after 23 years of follow-up. *Ann Rheum Dis* 2019; 78:586–9.
- 9 Radovits BJ, Fransen J, Al Shamma S *et al.* Excess mortality emerges after 10 years in an inception cohort of early rheumatoid arthritis. *Arthritis Care Res* 2010;62: 362–70.
- 10 Book C, Algulin J, Nilsson JA, Saxne T, Jacobsson L. Bone mineral density in the hand as a predictor for mortality in patients with rheumatoid arthritis. *Rheumatology* 2009;48:1088–91.
- 11 Troelsen LN, Garred P, Jacobsen S. Mortality and predictors of mortality in rheumatoid arthritis—a role for mannose-binding lectin? *J Rheumatol* 2010;37:536–43.
- 12 Singh JA, Furst DE, Bharat A, Curtis JR *et al.* 2012 update of the 2008 American College of Rheumatology recommendations for the use of disease-modifying antirheumatic drugs and biologic agents in the treatment of rheumatoid arthritis. *Arthritis Care Res* 2012;64: 625–39.
- 13 Lacaille D, Avina-Zubieta JA, Sayre EC, Abrahamowicz M. Improvement in 5-year mortality in incident rheumatoid arthritis compared with the general population-closing the mortality gap. *Ann Rheum Dis* 2017;76:1057–63.
- 14 van Vollenhoven RF, Ernestam S, Geborek P *et al.* Addition of infliximab compared with addition of sulfasalazine and hydroxychloroquine to methotrexate in patients with early rheumatoid arthritis (Swefot trial): 1-year results of a randomised trial. *Lancet* 2009;374: 459–66.
- 15 Arnett FC, Edworthy SM, Bloch DA *et al.* The American Rheumatism Association 1987 revised criteria for the classification of rheumatoid arthritis. *Arthritis Rheum* 1988;31:315–24.



- 16 Prevoo ML, van 't Hof MA, Kuper HH *et al.* Modified disease activity scores that include twenty-eight-joint counts. Development and validation in a prospective longitudinal study of patients with rheumatoid arthritis. *Arthritis Rheum* 1995;38:44–8.
- 17 van Vollenhoven RF, Geborek P, Forslind K *et al.* Conventional combination treatment versus biological treatment in methotrexate-refractory early rheumatoid arthritis: 2 year follow-up of the randomised, non-blinded, parallel-group Swefot trial. *Lancet* 2012;379: 1712–20.
- 18 Karlsson JA, Neovius M, Nilsson JA *et al.* Addition of infliximab compared with addition of sulfasalazine and hydroxychloroquine to methotrexate in early rheumatoid arthritis: 2-year quality-of-life results of the randomised, controlled, SWEFOT trial. *Ann Rheum Dis* 2013;72: 1927–33.
- 19 Eriksson JK, Neovius M, Bratt J *et al.* Biological vs. conventional combination treatment and work loss in early rheumatoid arthritis: a randomized trial. *JAMA Intern Med* 2013;173:1407–14.
- 20 Askling J, Fored CM, Geborek P *et al.* Swedish registers to examine drug safety and clinical issues in RA. *Ann Rheum Dis* 2006;65:707–12.
- 21 Ludvigsson JF, Almqvist C, Bonamy AK *et al.* Registers of the Swedish total population and their use in medical research. *Eur J Epidemiol* 2016;31: 125–36.
- 22 St Clair EW, van der Heijde DM, Smolen JS *et al.* Combination of infliximab and methotrexate therapy for early rheumatoid arthritis: a randomized, controlled trial. *Arthritis Rheum* 2004;50:3432–43.
- 23 Breedveld FC, Weisman MH, Kavanaugh AF, Cohen SB *et al.* The PREMIER study: a multicenter, randomized, double-blind clinical trial of combination therapy with adalimumab plus methotrexate versus methotrexate alone or adalimumab alone in patients with early, aggressive rheumatoid arthritis who had not had previous methotrexate treatment. *Arthritis Rheum* 2006; 54:26–37.
- 24 Emery P, Breedveld FC, Hall S *et al.* Comparison of methotrexate monotherapy with a combination of methotrexate and etanercept in active, early, moderate to severe rheumatoid arthritis (COMET): a randomised, double-blind, parallel treatment trial. *Lancet* 2008;372: 375–82.
- 25 Demets DL, Cook T. Challenges of non-intention-to-treat analyses. *JAMA* 2019;321:145.
